# Supplementary material for: Lupinus mutabilis Extract Exerts an Anti-Diabetic Effect by Improving Insulin Release in Type 2 Diabetic Goto-Kakizaki Rats
Source: PubMed Central journal article supplement (PMC6073986; doi:10.3390/nu10070933), 2018-07-20
Supplement: nutrients-10-00933-s001.pdf [file nutrients-10-00933-s001.pdf]

## Supplementary Materials

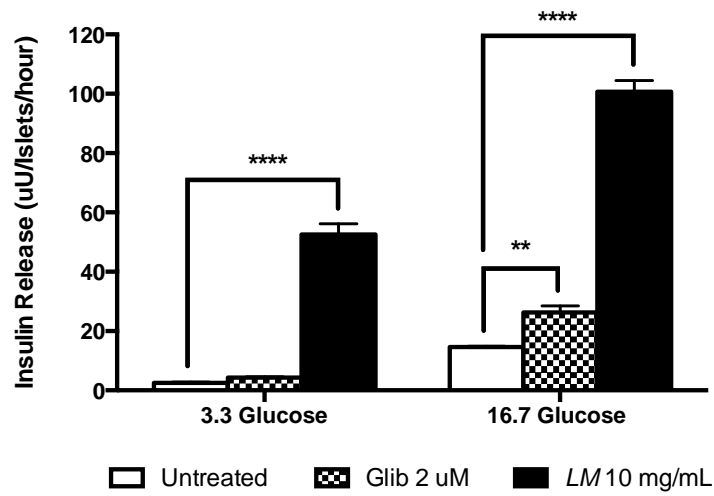

**Figure S1.** *LM* effect on insulin secretion was comparable with the effect of glibenclamide. Insulin secretion in GK islets was evaluated in low (3.3 mM) and high (16.7 mM) glucose in presence of a positive control Glibenclamide (2  $\mu$ M) and *LM* (10 mg/mL). Insulin concentration was measured by RIA. Data are presented as means  $\pm$  SEM ( $n = 3$ ), of triplicates from three independent experiments. \*  $p < 0.05$ , \*\*  $p < 0.01$ , \*\*\*  $p < 0.001$ , \*\*\*\*  $p < 0.0001$  when compared to untreated islets.

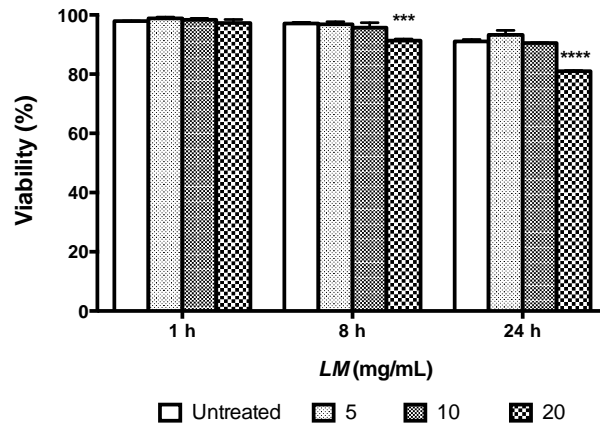

**Figure S2.** Cytotoxic effect of LM on W pancreatic islets. Pancreatic islets of W rats were incubated in presence of LM extract (5, 10 and 20 mg/mL). Cell viability was measured by MTT assay after 1, 8 and 24h of treatment. Data are presented as means  $\pm$  SEM ( $n = 3$ ), of triplicates from three independent experiments. \* $p < 0.05$ , \*\*  $p < 0.01$ , \*\*\*  $p < 0.001$ , \*\*\*\*  $p < 0.0001$  when compared to untreated islets.

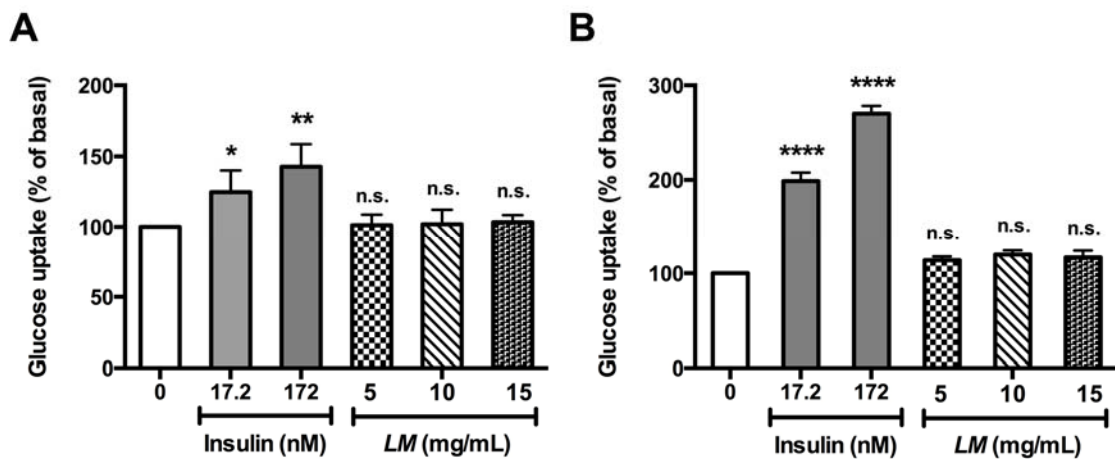

**Figure S3.** LM does not have effect on the glucose uptake in primary adipocytes. Glucose uptake in primary adipocytes was measured in disintegration per min/h (DPM/h) and the percentage of glucose uptake, relative to basal value was calculated. GK (A) and W rats (B) adipocytes were cultured in presence of LM (5-15 mg/mL) and insulin (17.2 and 172 nM) was used as positive control. Data are presented as means  $\pm$  standard error of the mean (SEM) ( $n = 3$ ), of triplicates from three independent experiments. \* $p < 0.05$ , \*\*  $p < 0.01$ , \*\*\*\*  $p < 0.0001$  when compared to basal value.

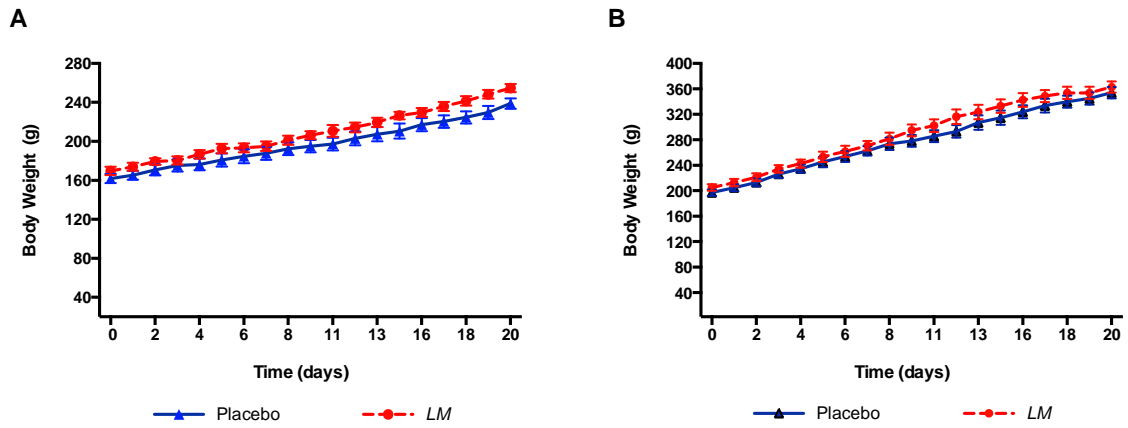

**Figure S4.** Effect of *LM* long-term treatment on body weight. The body weight was measured every day of *LM* treatment in GK (A) and W rats (B). Data are presented as means  $\pm$  SEM ( $n = 6$ ).

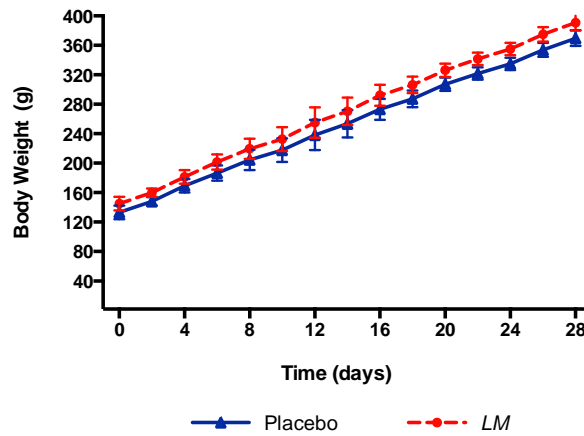

**Figure S5.** Effect on body weight of Wistar rats after 28 days of *LM* treatment. The body weight was measured every second day of treatment in W rats. Data are presented as means  $\pm$  SEM ( $n = 6$ ).

**Table S1. Effect on hematological and biochemical parameters of Wistar rats after 28 days of**

**LM treatment**

| <b>Parameters</b>                          | <b>Placebo</b> | <b>LM</b>    |
|--------------------------------------------|----------------|--------------|
| <b>Hematological</b>                       |                |              |
| Hematocrit (%)                             | 59.8 ± 1.7     | 59.0 ± 0.9   |
| Hemoglobin (g/dL)                          | 18.1 ± 0.5     | 17.0 ± 0.3   |
| Red Blood Cells ( × 10 <sup>6</sup> /μL)   | 9.0 ± 0.5      | 8.8 ± 0.5    |
| White Blood Cells ( × 10 <sup>3</sup> /μL) | 11.4 ± 1.4     | 13.2 ± 1.1   |
| Neutrophils (%)                            | 36.0 ± 1.6     | 36.3 ± 2.5   |
| Lymphocytes (%)                            | 64.5 ± 3.0     | 53.7 ± 3.8   |
| Monocytes (%)                              | 2.0 ± 0.3      | 1.5 ± 0.2    |
| Eosinophils (%)                            | 1.7 ± 0.2      | 1.2 ± 0.2    |
| Basophils (%)                              | 0.0 ± 0.0      | 0.0 ± 0.0    |
| <b>Biochemical</b>                         |                |              |
| Triglycerides (mg/dL)                      | 30.0 ± 4.3     | 29.1 ± 5.1   |
| Cholesterol (mg/dL)                        | 43.3 ± 3.0     | 51.2 ± 2.9   |
| Glucose (μM)                               | 6.8 ± 0.7      | 6.2 ± 0.7    |
| Creatinine (mg/dL)                         | 0.4 ± 0.02     | 0.3 ± 0.02   |
| Alkaline Phosphatase (U/L)                 | 118.0 ± 12.6   | 127.3 ± 10.8 |
| Aspartate Aminotransferase (U/L)           | 126.0 ± 14.6   | 121.6 ± 15.4 |
| Alanine Aminotransferase (U/L)             | 37.0 ± 3.1     | 39.4 ± 2.7   |

Data are presented as means ± SEM (*n* = 6).
